# Supplementary material
Source: PubMed Central journal article supplement (PMC4187738)
Supplement: MCB.00099-14_zmb999100595so1.pdf [file MCB.00099-14_zmb999100595so1.pdf]

## **Supplemental Material**

### **The Hypoxia-Inducible Epigenetic Regulators Jmjd1a and G9a Provide a Mechanistic Link between Angiogenesis and Tumor Growth**

Jun Ueda, Jolene Caifeng Ho, Kian Leong Lee, Shojiro Kitajima, Henry Yang, Wendi Sun, Noriko Fukuhara, Norazean Zaiden, Shing Leng Chan, Makoto Tachibana, Yoichi Shinkai, Hiroyuki Kato and Lorenz Poellinger

## Supplemental Tables

### Supplemental Table S1.

Comparison of *JMJD1A* expression across 6 microarray datasets on human germ cell tumors.

Meta-analysis was performed using NextBio (<http://www.nextbio.com/>) (Kupersmidt et al, 2010).

|    | NCBI<br>GEO<br>Accession | Score    | Bioset Name                                                         | P-value  | Fold Change |
|----|--------------------------|----------|---------------------------------------------------------------------|----------|-------------|
| 1  | GSE1818                  | 53.20847 | Testicular germ cell choriocarcinoma vs Normal testis               | 0.006    | -8.71       |
| 2  | GSE1818                  | 38.30537 | Testicular germ cell seminoma neoplasia vs Normal testis            | 0.0011   | -4.78       |
| 3  | GSE1818                  | 31.8299  | Testicular germ cell embryonal carcinoma vs Normal testis           | 0.0014   | -3.62       |
| 4  | GSE1818                  | 27.31897 | Testicular germ cell yolk sac tumor vs Normal testis                | 0.0013   | -2.91       |
| 5  | GSE1818                  | 23.70376 | Testicular germ cell teratoma tumor vs Normal testis                | 0.0012   | -2.39       |
| 6  | GSE3218                  | 40.92892 | Adult germ cell carcinoma - Choriocarcinoma vs Normal testis        | 0.0068   | -4.08       |
| 7  | GSE3218                  | 36.39328 | Adult germ cell carcinoma - Embryonal carcinoma vs Normal testis    | 5.90E-10 | -4.13       |
| 8  | GSE3218                  | 34.03421 | Adult germ cell carcinoma - Seminoma vs Normal testis               | 3.40E-08 | -3.63       |
| 9  | GSE3218                  | 33.52487 | Adult germ cell carcinoma - Teratoma vs Normal testis               | 3.80E-10 | -4.07       |
| 10 | GSE3218                  | 32.11531 | Adult germ cell carcinoma - Mixed germ cell tumor vs Normal testis  | 4.80E-10 | -3.15       |
| 11 | GSE3218                  | 28.09652 | Adult germ cell carcinoma - Yolk sac tumor vs Normal testis         | 1.40E-05 | -3.15       |
| 12 | GSE3921                  | 22.20022 | Yolk sac carcinoma cells vs Normal testis cells                     | 0.0007   | -3.03       |
| 13 | GSE3921                  | 9.385318 | Embryonic carcinoma cells vs Normal testis cells                    | 0.0002   | -2.01       |
| 14 | GSE3921                  | 7.174898 | Seminoma cells vs Normal testis cells                               | 0.017    | -1.48       |
| 15 | GSE8607                  | 31.95031 | Testicular seminoma stage 3 vs Normal testis                        | 0.0026   | -4.64       |
| 16 | GSE8607                  | 23.17454 | Testicular seminoma stage 1 vs Normal testis                        | 0.0003   | -3.34       |
| 17 | GSE8607                  | 21.54903 | Testicular seminoma stage 2 vs Normal testis                        | 0.0003   | -3.24       |
| 18 | GSE10615                 | 24.39024 | Pediatric malignant germ cell tumors - Yolk sac tumors vs Seminomas | 4.40E-05 | -2.11       |
| 19 | GSE18155                 | 28.49003 | Seminoma tumor in adult testis vs Normal testis                     | 3.10E-07 | -3.41       |
| 20 | GSE18155                 | 17.64914 | Yolk sac tumor in adult testis vs Normal testis                     | 1.30E-05 | -2.52       |

**Supplemental Table S2.**

Primers used for quantitative RT-PCR analysis of gene expression.

| Gene               | Forward                    | Reverse                     |
|--------------------|----------------------------|-----------------------------|
| <i>Adm</i>         | GACAACGCACCCCTTTATCAG      | GCGAGTGAACCCAATAACATCA      |
| <i>Aire</i>        | CAATCTCCGCTGCAAATCCT       | CCTATGTAGAACAGGGTCGTGACTAG  |
| <i>Cdc42ep2</i>    | GCGCTCCTCAAGCTTCTCAA       | TGGAGAGCTGGAGGCAGAAA        |
| <i>Dnaje5g</i>     | CGCAACCCAGCGACTATCTAG      | TGCAAGGCCAGTTTCCTGTAG       |
| <i>G9a (Ehmt2)</i> | CCACGCATTGCCTTCTTCA        | AGAATCGGTCACCGTAGTCAAAG     |
| <i>Hmox1</i>       | ACTAGCCCAGTCCGGTGATG       | TTCAAGGCCTCAGACAAATCCT      |
| <i>Ifi47</i>       | GTGGGCTGCAGTGAGAAACA       | GAAGGCTGAGATGAACTGATCCA     |
| <i>Igfbp4</i>      | GCAACTTCCACCCCAAACAGT      | CCTGTCTTCCGATCCACACA        |
| <i>Jmjd1a 201</i>  | TCTCTCTCAGTGTCCAGCTTTGAA   | CGTGAGCACCATGGTTTCC         |
| <i>Jmjd1a</i>      | CCAGGAGAAGACTTCAGAGACATG   | GGTGTACTCAGGCAGTGGAAATG     |
| <i>Klf4</i>        | GCGGGAAGGGAGAAGACACT       | TCGCTTCATGTGAGAGAGTTCCT     |
| <i>Liph</i>        | GGCTTAGAGGCAAGTATGTTTACCA  | GGACACCTGCCCATTTGATAGGT     |
| <i>Nanog</i>       | GGTTGAAGACTAGCAATGGTCTGA   | GGATAGCTGCAATGGATGCTG       |
| <i>Notch4</i>      | GAGGACCTGGTTGAAGAATTGATC   | TGCAGTTTTTCCCCTTTTATCC      |
| <i>Npy</i>         | GAAAACGCCCCAGAACAA         | AAGTCGGGAGAACAAGTTTCATTT    |
| <i>Oct4</i>        | ACCTTCAGGAGATATGCAAATCG    | TTCTCAATGCTAGTTCGCTTTCTCT   |
| <i>Oct4 Ex3-4</i>  | AGCCGACAACAATGAGAACCT      | AGACTCCACCTCACACGGT         |
| <i>Rab27a</i>      | CGGGAAGTTCGCGAGAAGTA       | TCTCAATCGCGTGGCTTATG        |
| <i>Robo4</i>       | CCAGGGAAGCTGACTGTGTCTT     | TCGGGTCAGGGAGAGATCAC        |
| <i>Sox2</i>        | ACTGCCCTGTTCGCACAT         | TTCCCTTGTATCTCTTTGAAAATCTCT |
| <i>Stc2</i>        | ACAGGAGCTCGCAGCAGAA        | TGACCAAACAGTGCTGGATCTC      |
| <i>Ubc2</i>        | AGGAGGCTGATGAAGGAGCTT GA   | TGGTTTGAATGGATACTCTGCTGGA   |
| <i>Vegf-a</i>      | TACCTCCACCATGCCAAGTG       | TCATGGGACTTCTGCTCTCCTT      |
| <i>Ywhaz</i>       | CGTTGTAGGAGCCCGTAGGTCAT    | TCTGGTTGCGAAGCATTGGG        |
| <i>Zap70</i>       | CCTGAGATGTATGCACTTATGAGTGA | CGTTGTTCCACAGTCAGGAAGTC     |

**Supplemental Table S3.**

Primers used for Q-PCR analysis of chromatin immunoprecipitation (ChIP) enrichments.

| Target Loci     | Forward                   | Reverse                    |
|-----------------|---------------------------|----------------------------|
| <i>Igfbp4-a</i> | CATGCCCCAGAGGTAGAACTG     | AGGCGCTCTAGGAGATATTTATATGG |
| <i>Igfbp4-b</i> | GGTGCCTTTCTCCCTCCAA       | TTAGGCCACCTCCCACCTTTCT     |
| <i>Igfbp4-c</i> | GCCACCGCTTCCAACTG         | CCGCTACAACATCTGAAAGTCCTT   |
| <i>Igfbp4-d</i> | CCCTGCAACTTAGTTCCCATTC    | TGCCACGTACCTCCCTTCTC       |
| <i>Igfbp4-e</i> | CCTCTGACAGCCAGGCTCTCT     | AGCATCCGGACTGCAACAA        |
| <i>Igfbp4-f</i> | TGGCAAGCTATGGCCAATG       | CGATCCTGCAAGGCTGGTA        |
| <i>Notch4-a</i> | GGGACTGCTCACACAGGATATTC   | CTTGTGCATTTCTGTCTGTTCTT    |
| <i>Notch4-b</i> | AGCAGGAGCATCAGGAGTTCA     | CAGTAGGATCTGCCTGCTAGGAA    |
| <i>Notch4-c</i> | ACACGTTGCTGCTCCTTTGA      | GGAAGGGCAGGTCTTAGACAGA     |
| <i>Notch4-d</i> | CAGGTTTGTGCCTGGTGCTA      | CTTCAGAACCAGCTGGCTTCTC     |
| <i>Notch4-e</i> | GCCAAACCCATCTGGAAGAG      | GGCTCGCAGGAGCACTGT         |
| <i>Notch4-f</i> | GGCAGAGGCAGGAGCATCT       | TTTTTGACGCAGGGTCTCTCTAC    |
| <i>Robo4-a</i>  | CACCAGACCCCTAAAGTAGAAACTT | TCCAGTACTACGATTGTCTCATTTCC |
| <i>Robo4-b</i>  | GGGAGAAGGGTCAGCTGTGTT     | CTGAGCTTCAGCGGAAAAGC       |
| <i>Robo4-c</i>  | TTGGACCAGAGATAGACACTTGCT  | AGGGCTTACAGGCCAAGAAAG      |
| <i>Robo4-d</i>  | CTCTGCTGCTGCTTTTCATCA     | TTGTCCTGCTGGCTTTGGAT       |
| <i>Robo4-e</i>  | GGCCAACCACCTCCCCTAT       | TCCCATCCGGCAAAAGGTA        |
| <i>Robo4-f</i>  | TGTATGGCCACCAACAATGC      | CAGAGTTCTCTCCTGAGCCCTTAT   |
| <i>Mlh1-a</i>   | TGGACCACAACGGCTTACG       | CACTGTTTCGAGTTGCCACAA      |
| <i>Mlh1-b</i>   | TTGGGACTCACGGCCTTCT       | CCACGACCCACACTTTAAGGA      |
| <i>Mlh1-c</i>   | CAGGCTCCACCACCAGGTAT      | TGACGCCCAAGAGGATTAGG       |

### **Supplemental Reference**

Kupersmidt I, Su QJ, Grewal A, Sundaresh S, Halperin I, Flynn J, Shekar M, Wang H, Park J, Cui W et al (2010) Ontology-based meta-analysis of global collections of high-throughput public data. PLoS One 5
